# Supplementary material for: Arbuscular Mycorrhizal Fungi Improve Growth, Photosynthetic Activity, and Chlorophyll Fluorescence of Vitis vinifera L. cv. Ecolly under Drought Stress
Source: MDPI journal article supplement (doi:10.3390/agronomy12071563), 2022-06-29
Supplement: s1 [file s1]

Archive with 1 entries (1 files):
- agronomy-1762981-supplementary.pdf
