# Supplementary material for: Arbuscular Mycorrhizal Fungi Improve Growth, Photosynthetic Activity, and Chlorophyll Fluorescence of Vitis vinifera L. cv. Ecolly under Drought Stress
Source: MDPI journal article supplement (doi:10.3390/agronomy12071563), 2022-06-29
Supplement: s1 [file s1 › agronomy-1762981-supplementary.pdf]

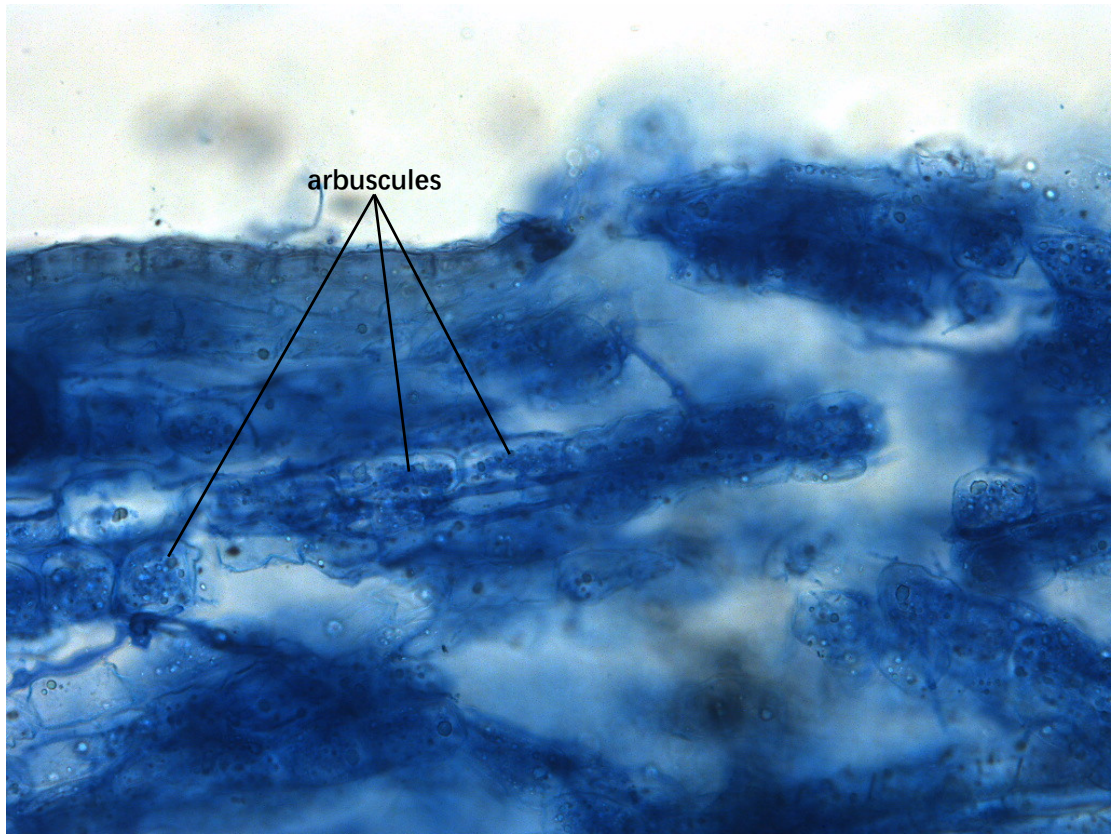

A

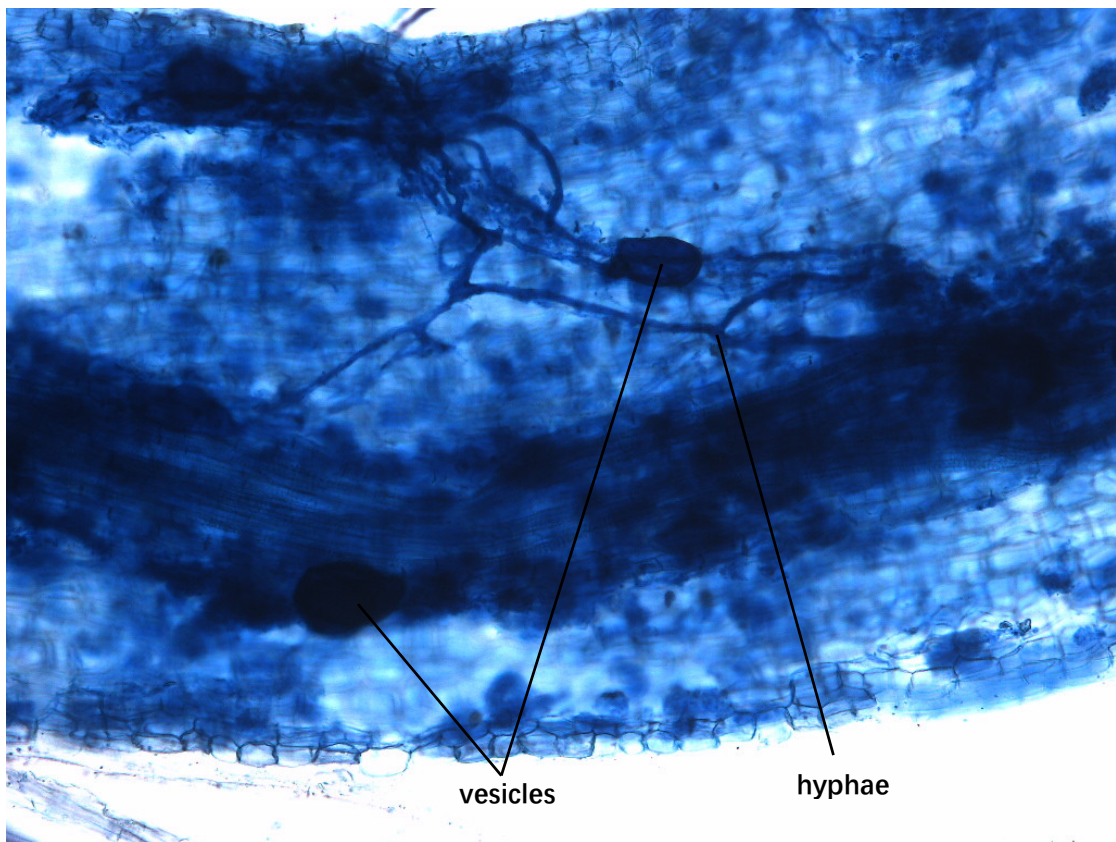

B

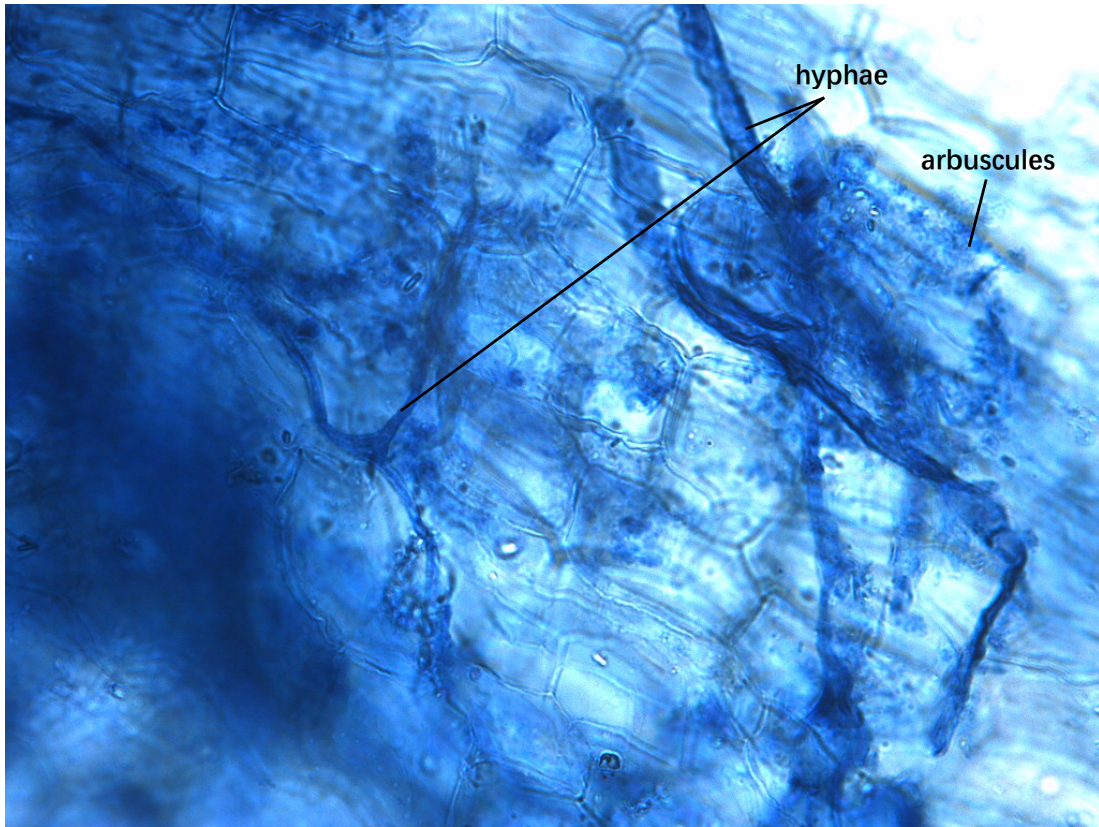

C

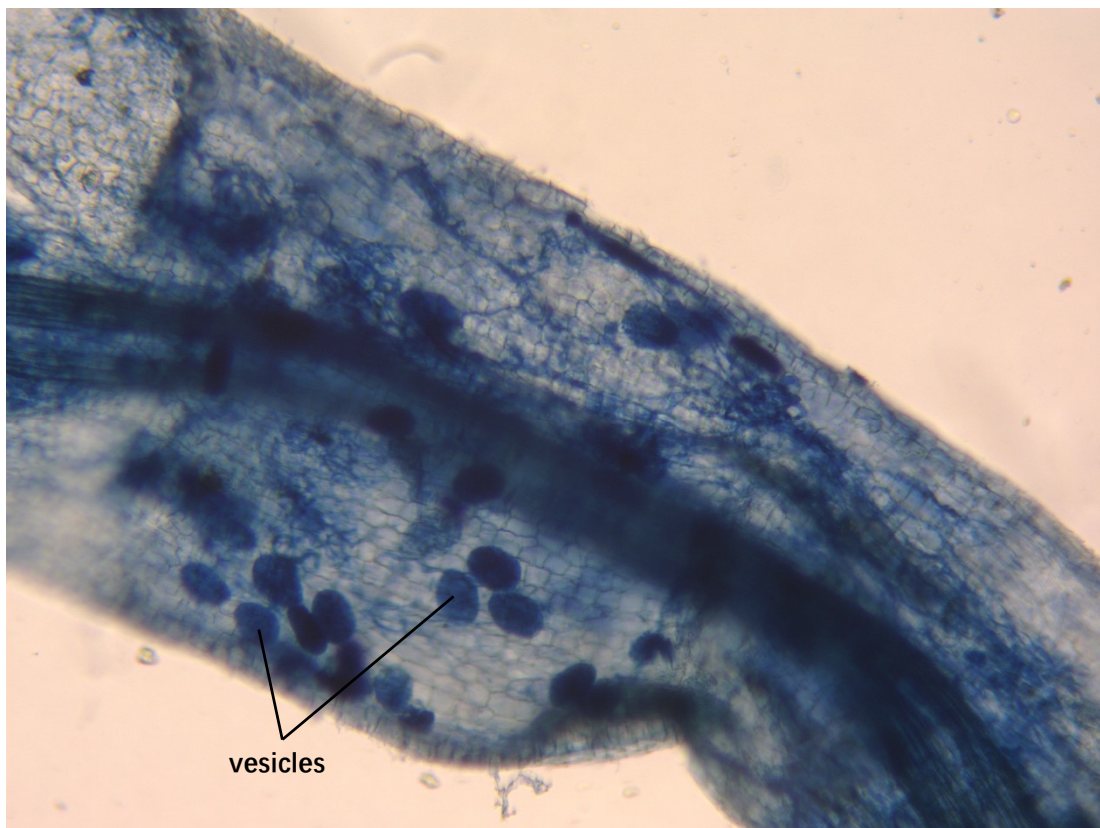

D

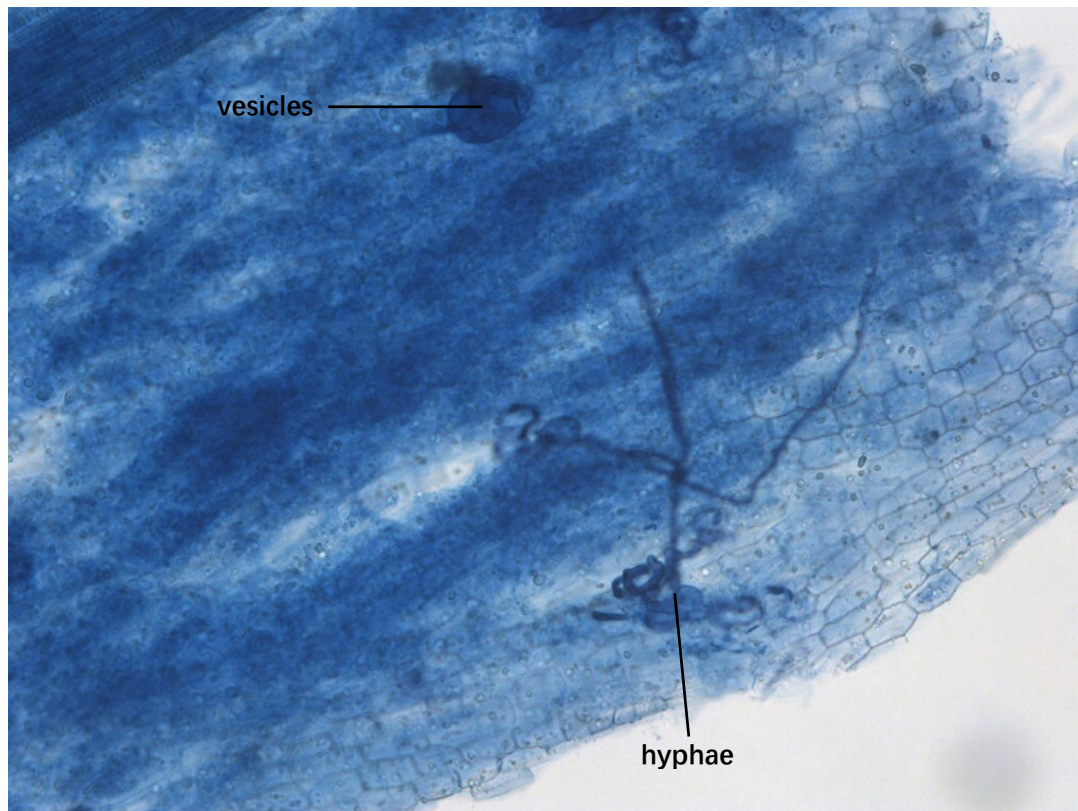

E

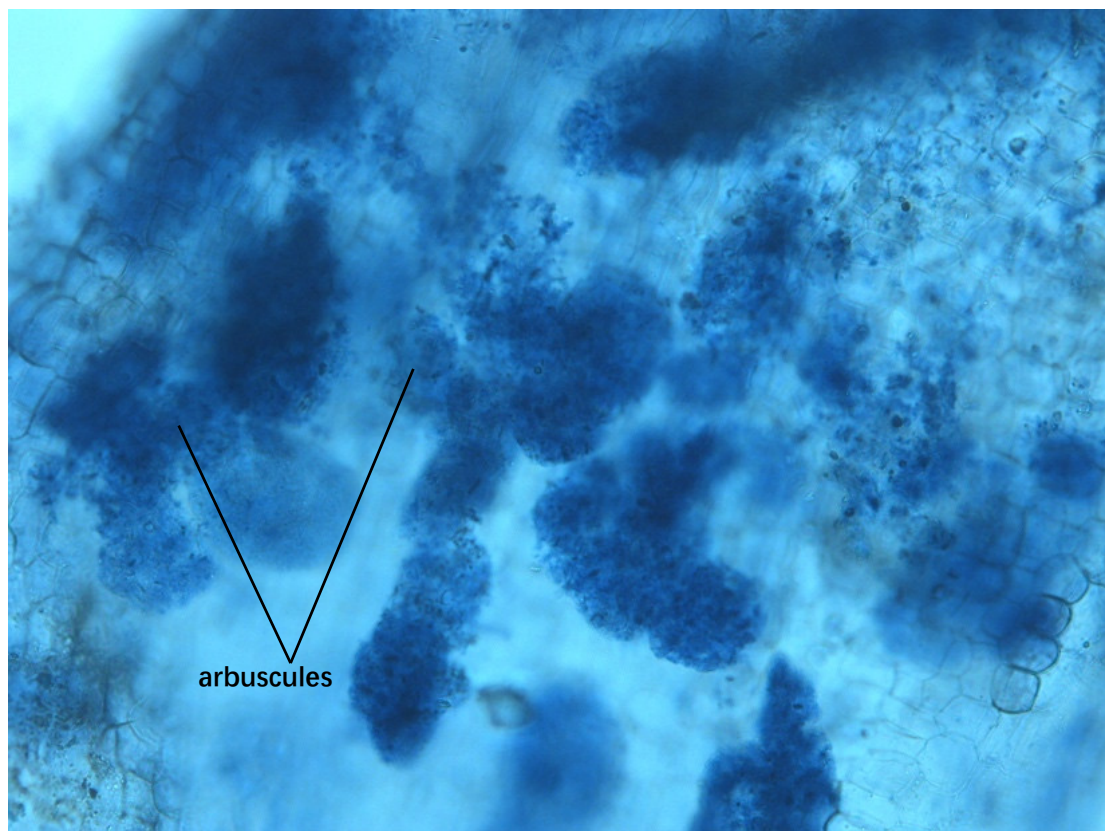

F

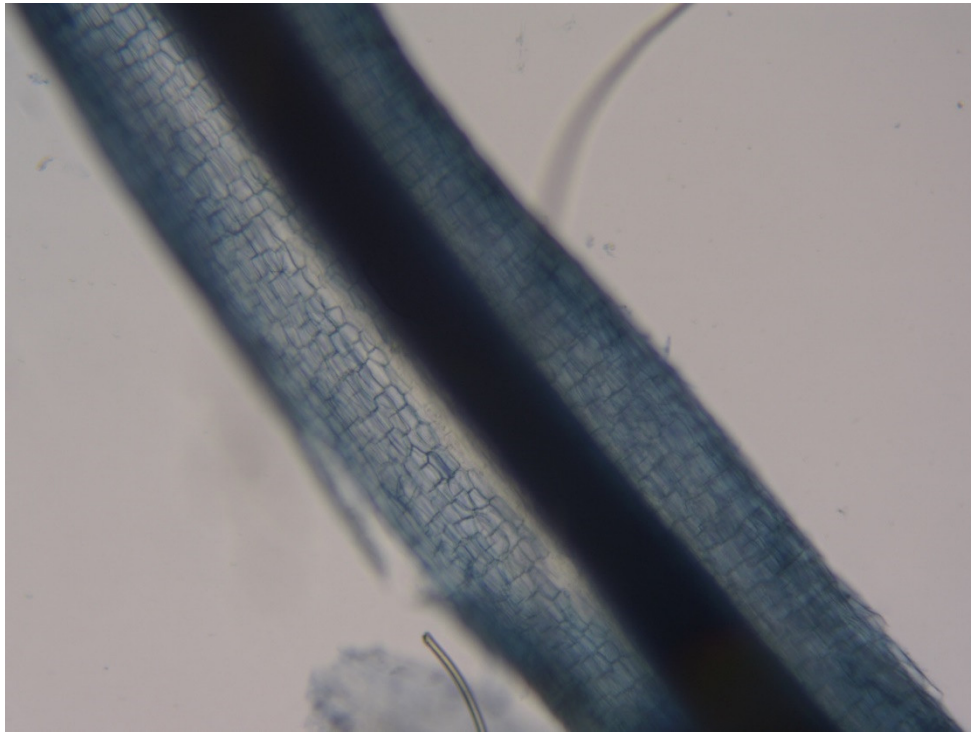

G

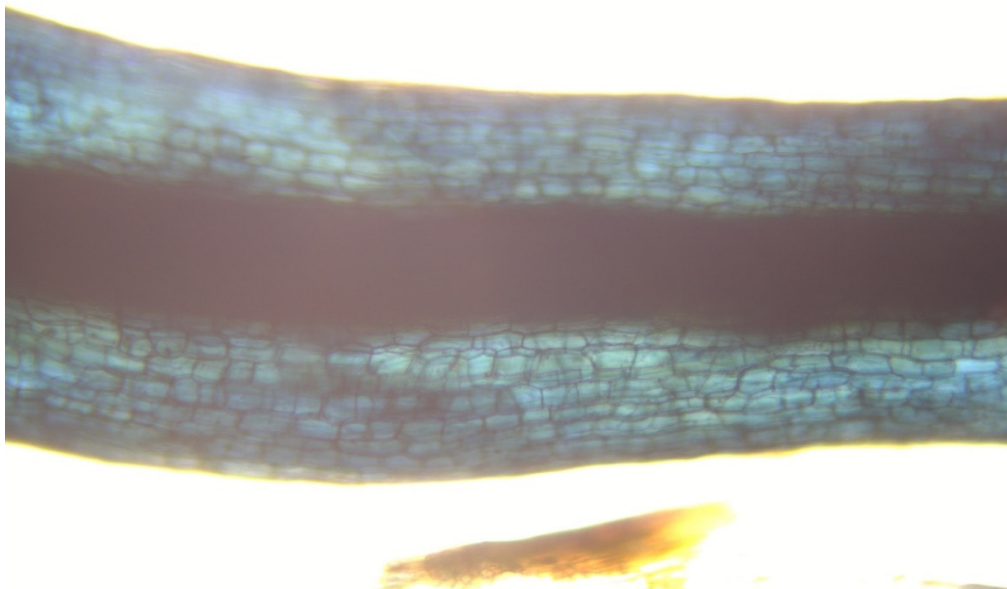

H

**Figure S1.** Photos of mycorrhizal and non-mycorrhizal grapevines 'Ecolly' roots observed with optical microscope. A-F: stained mycorrhizal grapevines roots; G & H: stained non-mycorrhizal grapevines roots.

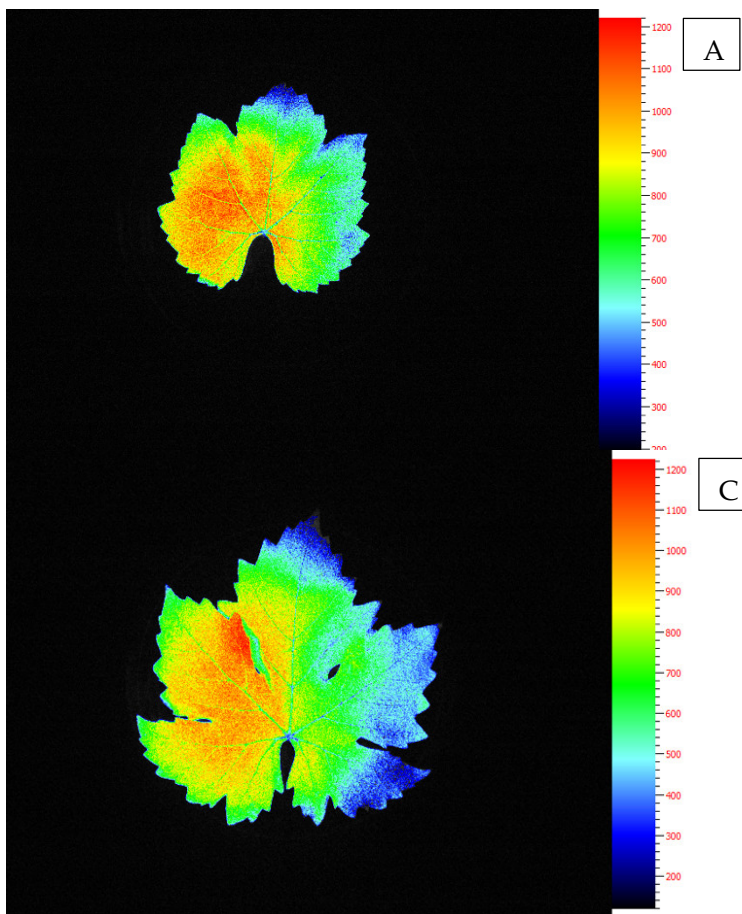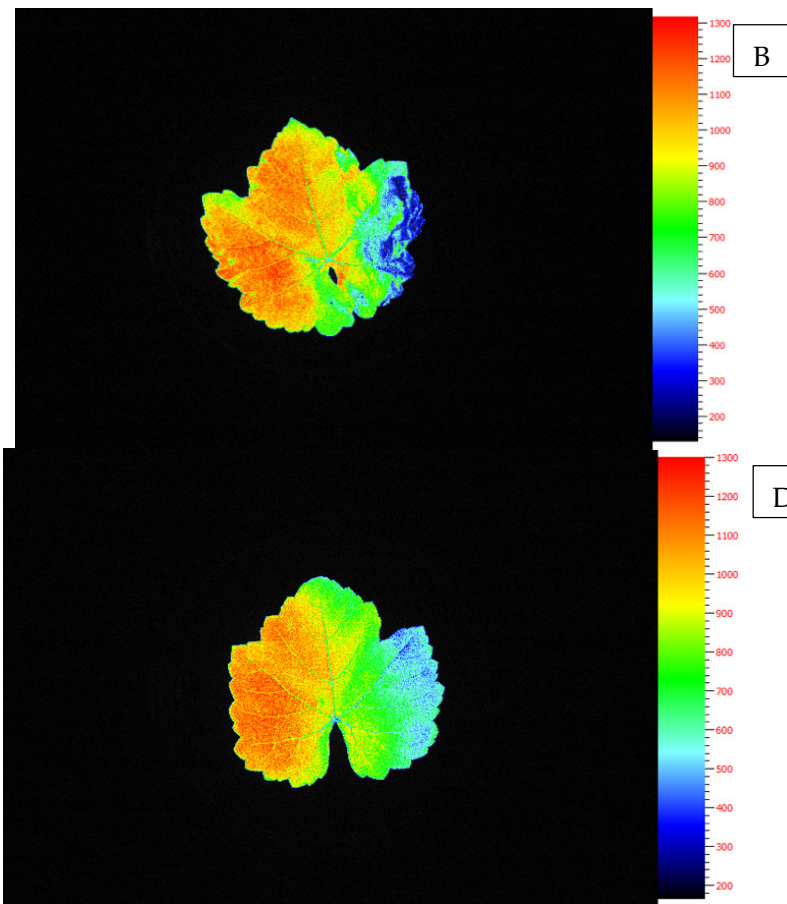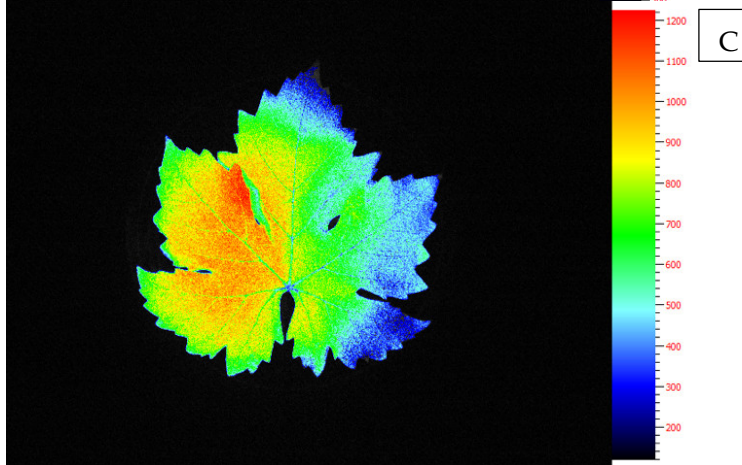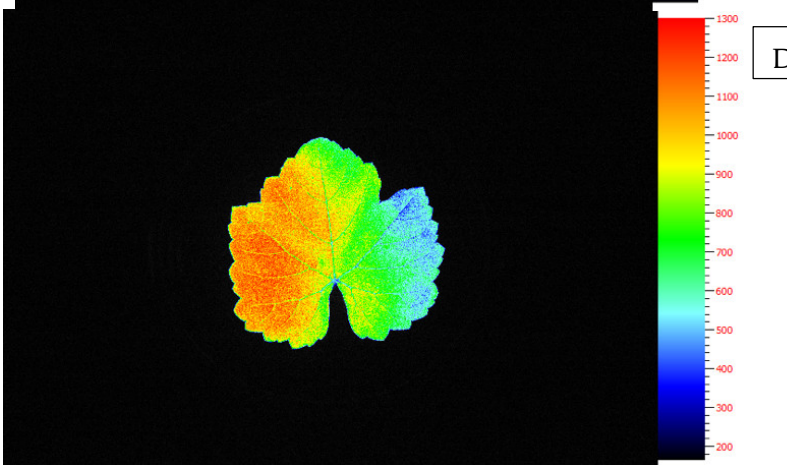

**Figure S2.** Photos of chlorophyll fluorescence imaging taken by FluorCam FC 800-C/1010 system. A: non-AMF colonization, well-watered; B: non-AMF colonization, drought stress; C: AMF colonization, well-watered; D: AMF colonization, drought stress. The color green and blue mean healthy condition of leaves. Reddish colors showed the area that suffered from the stress of leaves. Photos showed the parameters of the maximal photochemical efficiency of PSII Fv/Fm. It indicated AM fungi inoculation increased the parameters of the maximal photochemical efficiency of PSII Fv/Fm compared with non-mycorrhizal plants.
